# Supplementary material
Source: publisher site journal article supplement (https://www.dovepress.com/get_supplementary_file.php?f=337111.docx)
Supplement: Supplementary file 1 [file get_supplementary_file.php]

**Figure S1**. The expression level of PRRC2A between HCC and normal tissues from database. (**A**) Roessler Liver from Oncomine. (**B**) Roessler Liver 2 from Oncomine. (**C**) GEO database. ** P< 0.01, *** P< 0.001.
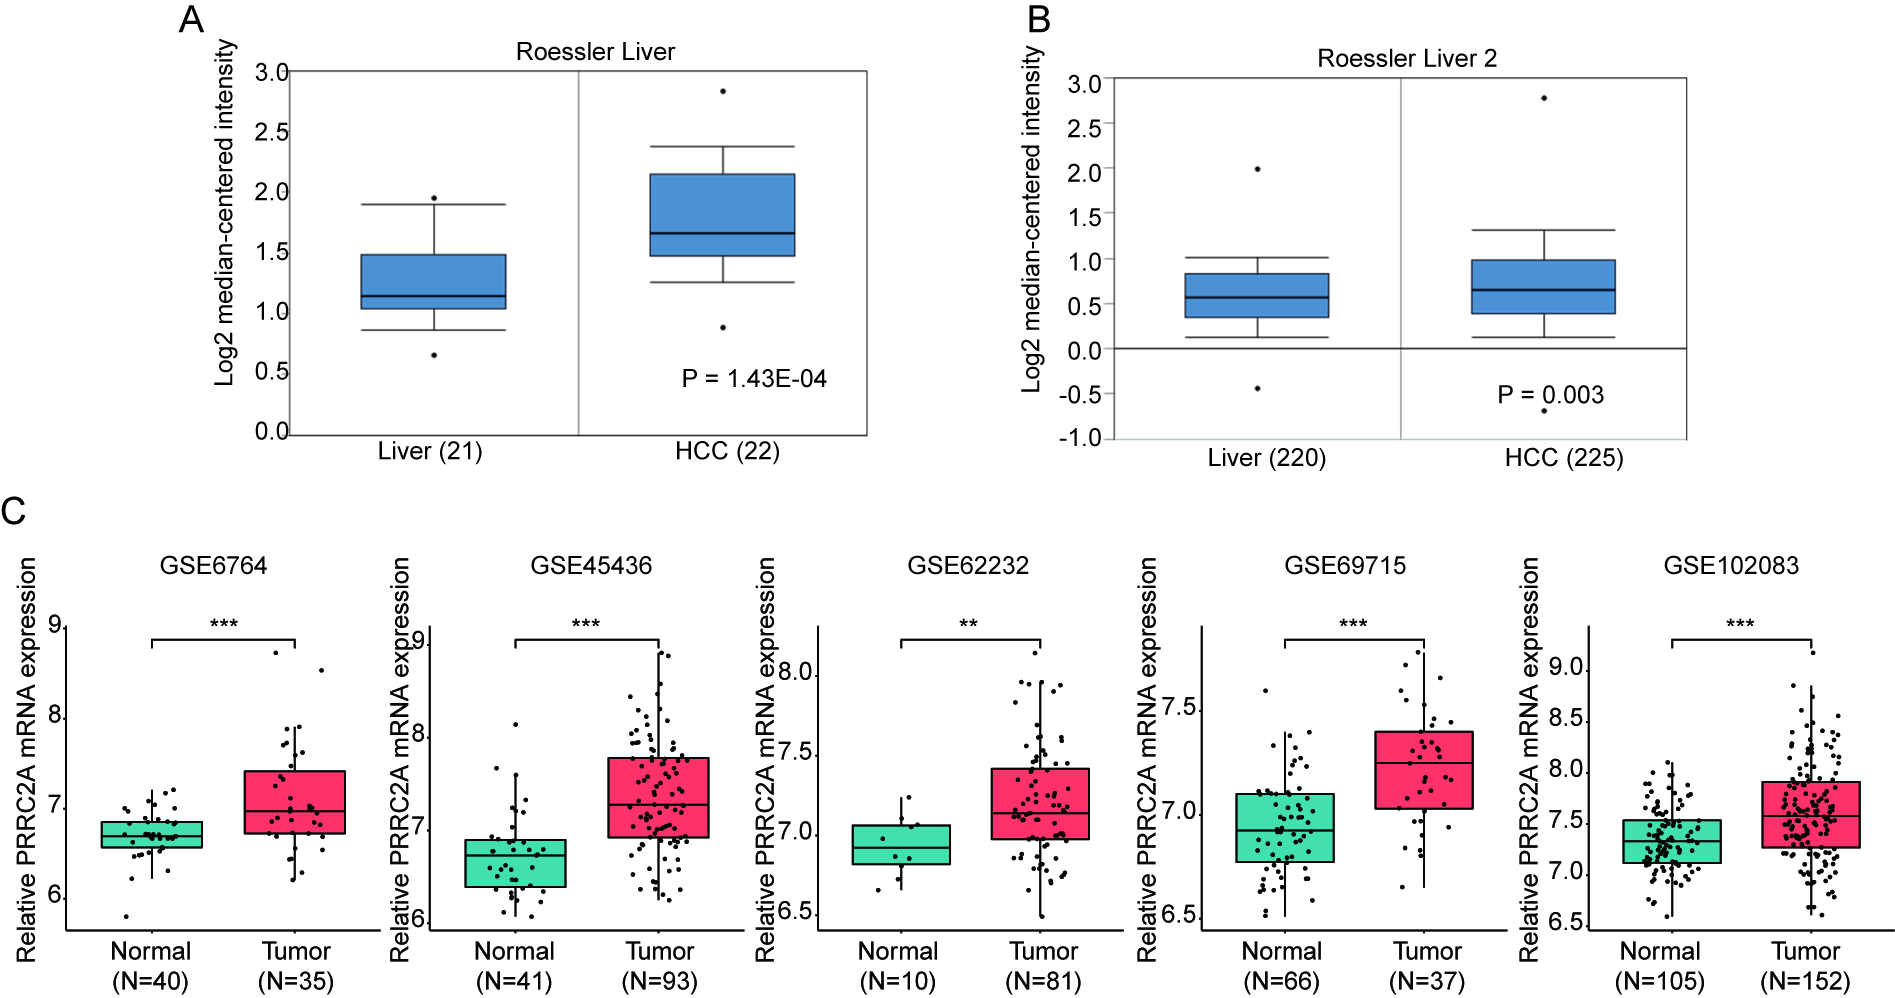


**Figure S2**. The expression profile and prognostic value of PRRC2A in HCC. (**A**) The expression level of PRRC2A between HCC and normal tissues from HCCDB database. (**B**) The Kaplan–Meier curves about the correlation between PRRC2A expression and DFS. (**C**) Univariate and multivariate analyses of PRRC2A expression for DFS.


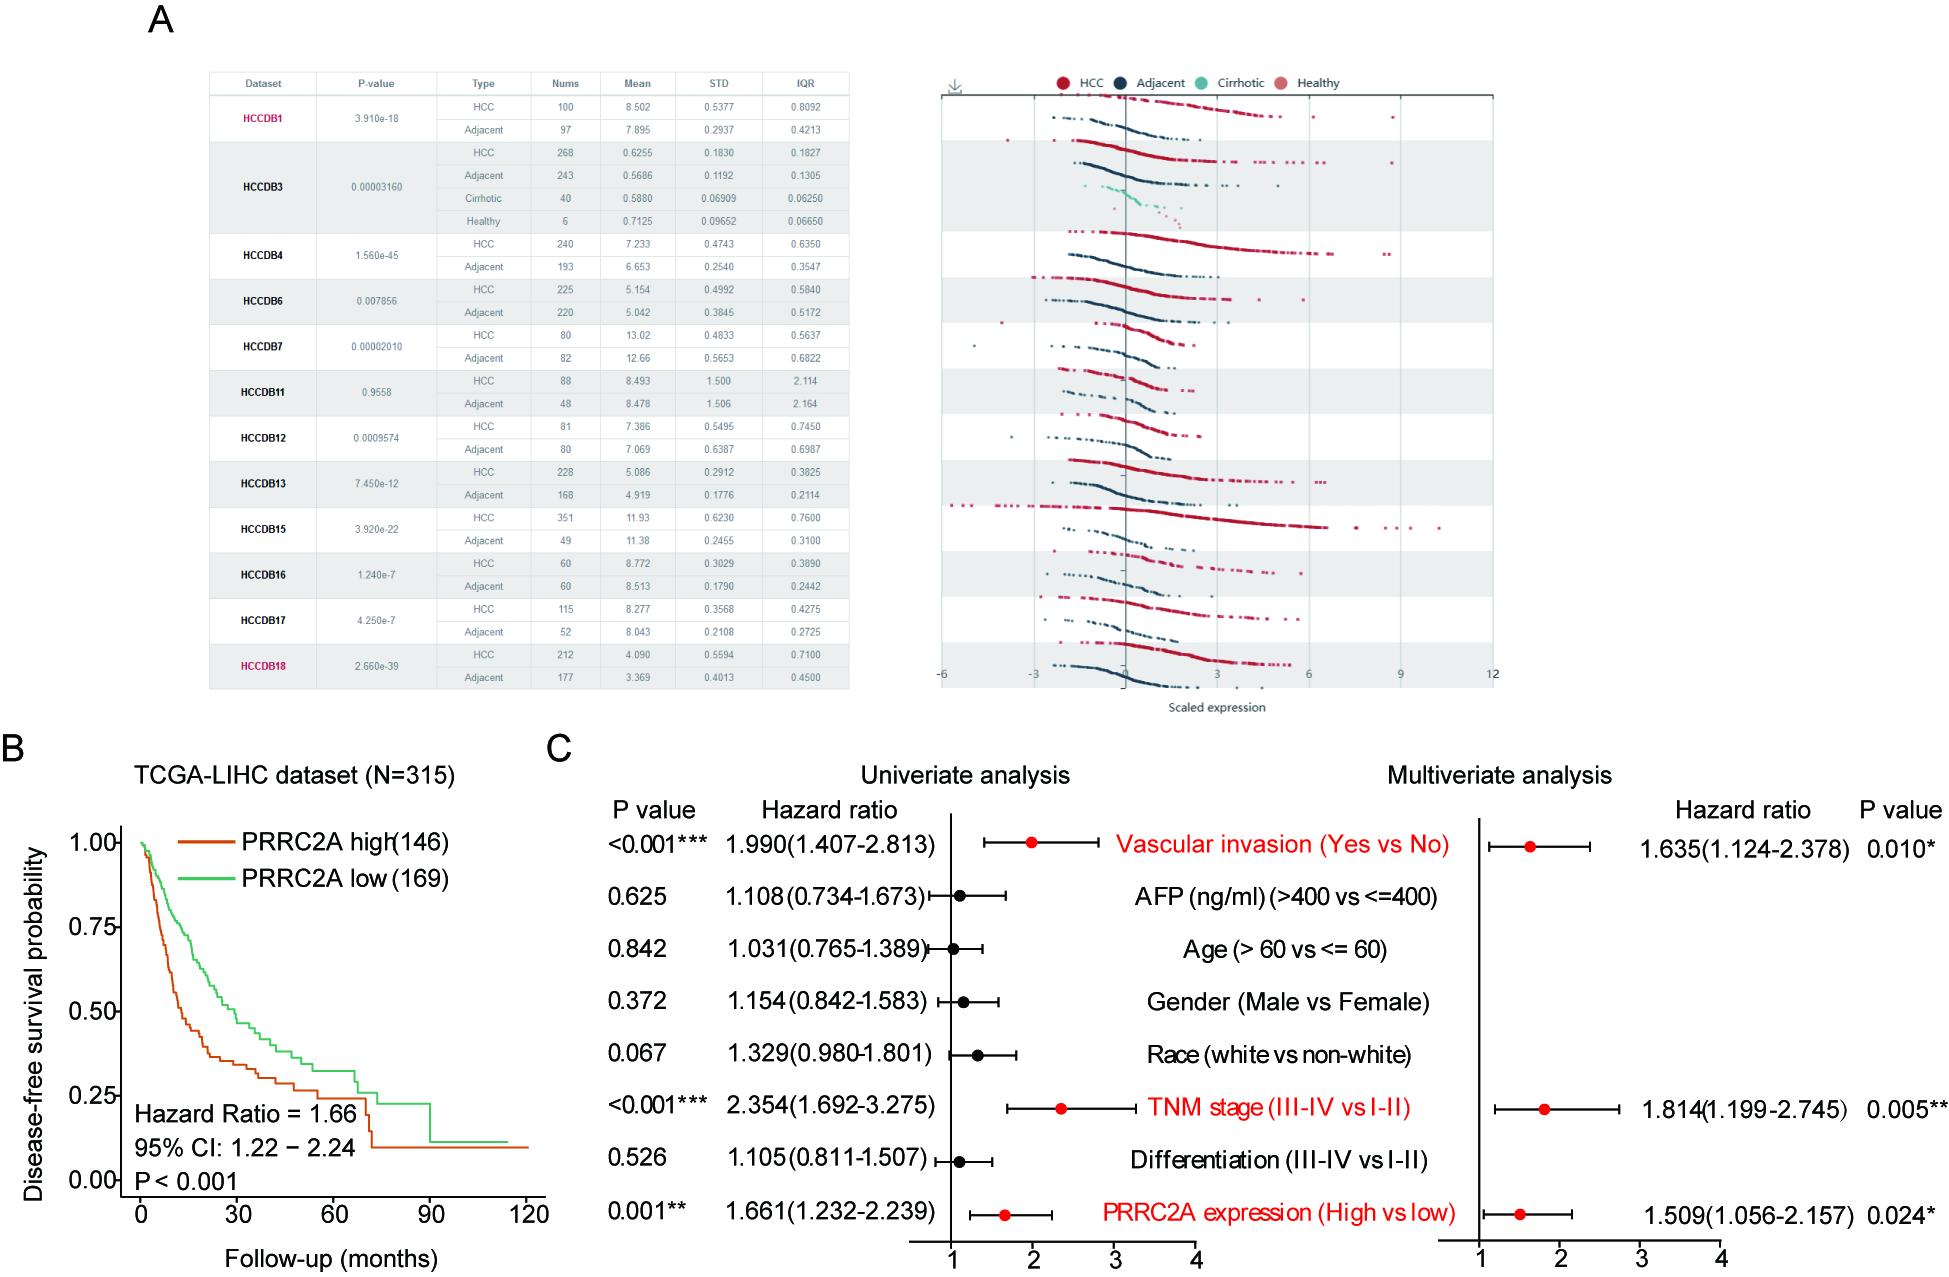


**Figure S3**. DNA amplification and promoter hypomethylation contributed to PRRC2A upregulation in HCC. (**A**) Oncoprint of PRRC2A alterations in HCC. (**B**) Box plots of PRRC2A mRNA expression in HCC tissues with indicating genetic status. (**C**) Correlation analysis between PRRC2A expression and copy number variation. (**D-F**) The copy number in HCC and normal tissues from Oncomine database. (**G**) The association between gene promoter methylation and PRRC2A expression. (**H**) The promoter methylation in HCC and normal tissues from UALCAN database. (**I-J**) The promoter methylation in different TNM stage (**I**) and differentiation grade (**J**) in HCC from UALCAN database. * P< 0.05, ** P< 0.01, *** P< 0.001, ****P< 0.0001, ns = not significance (P > 0.05).


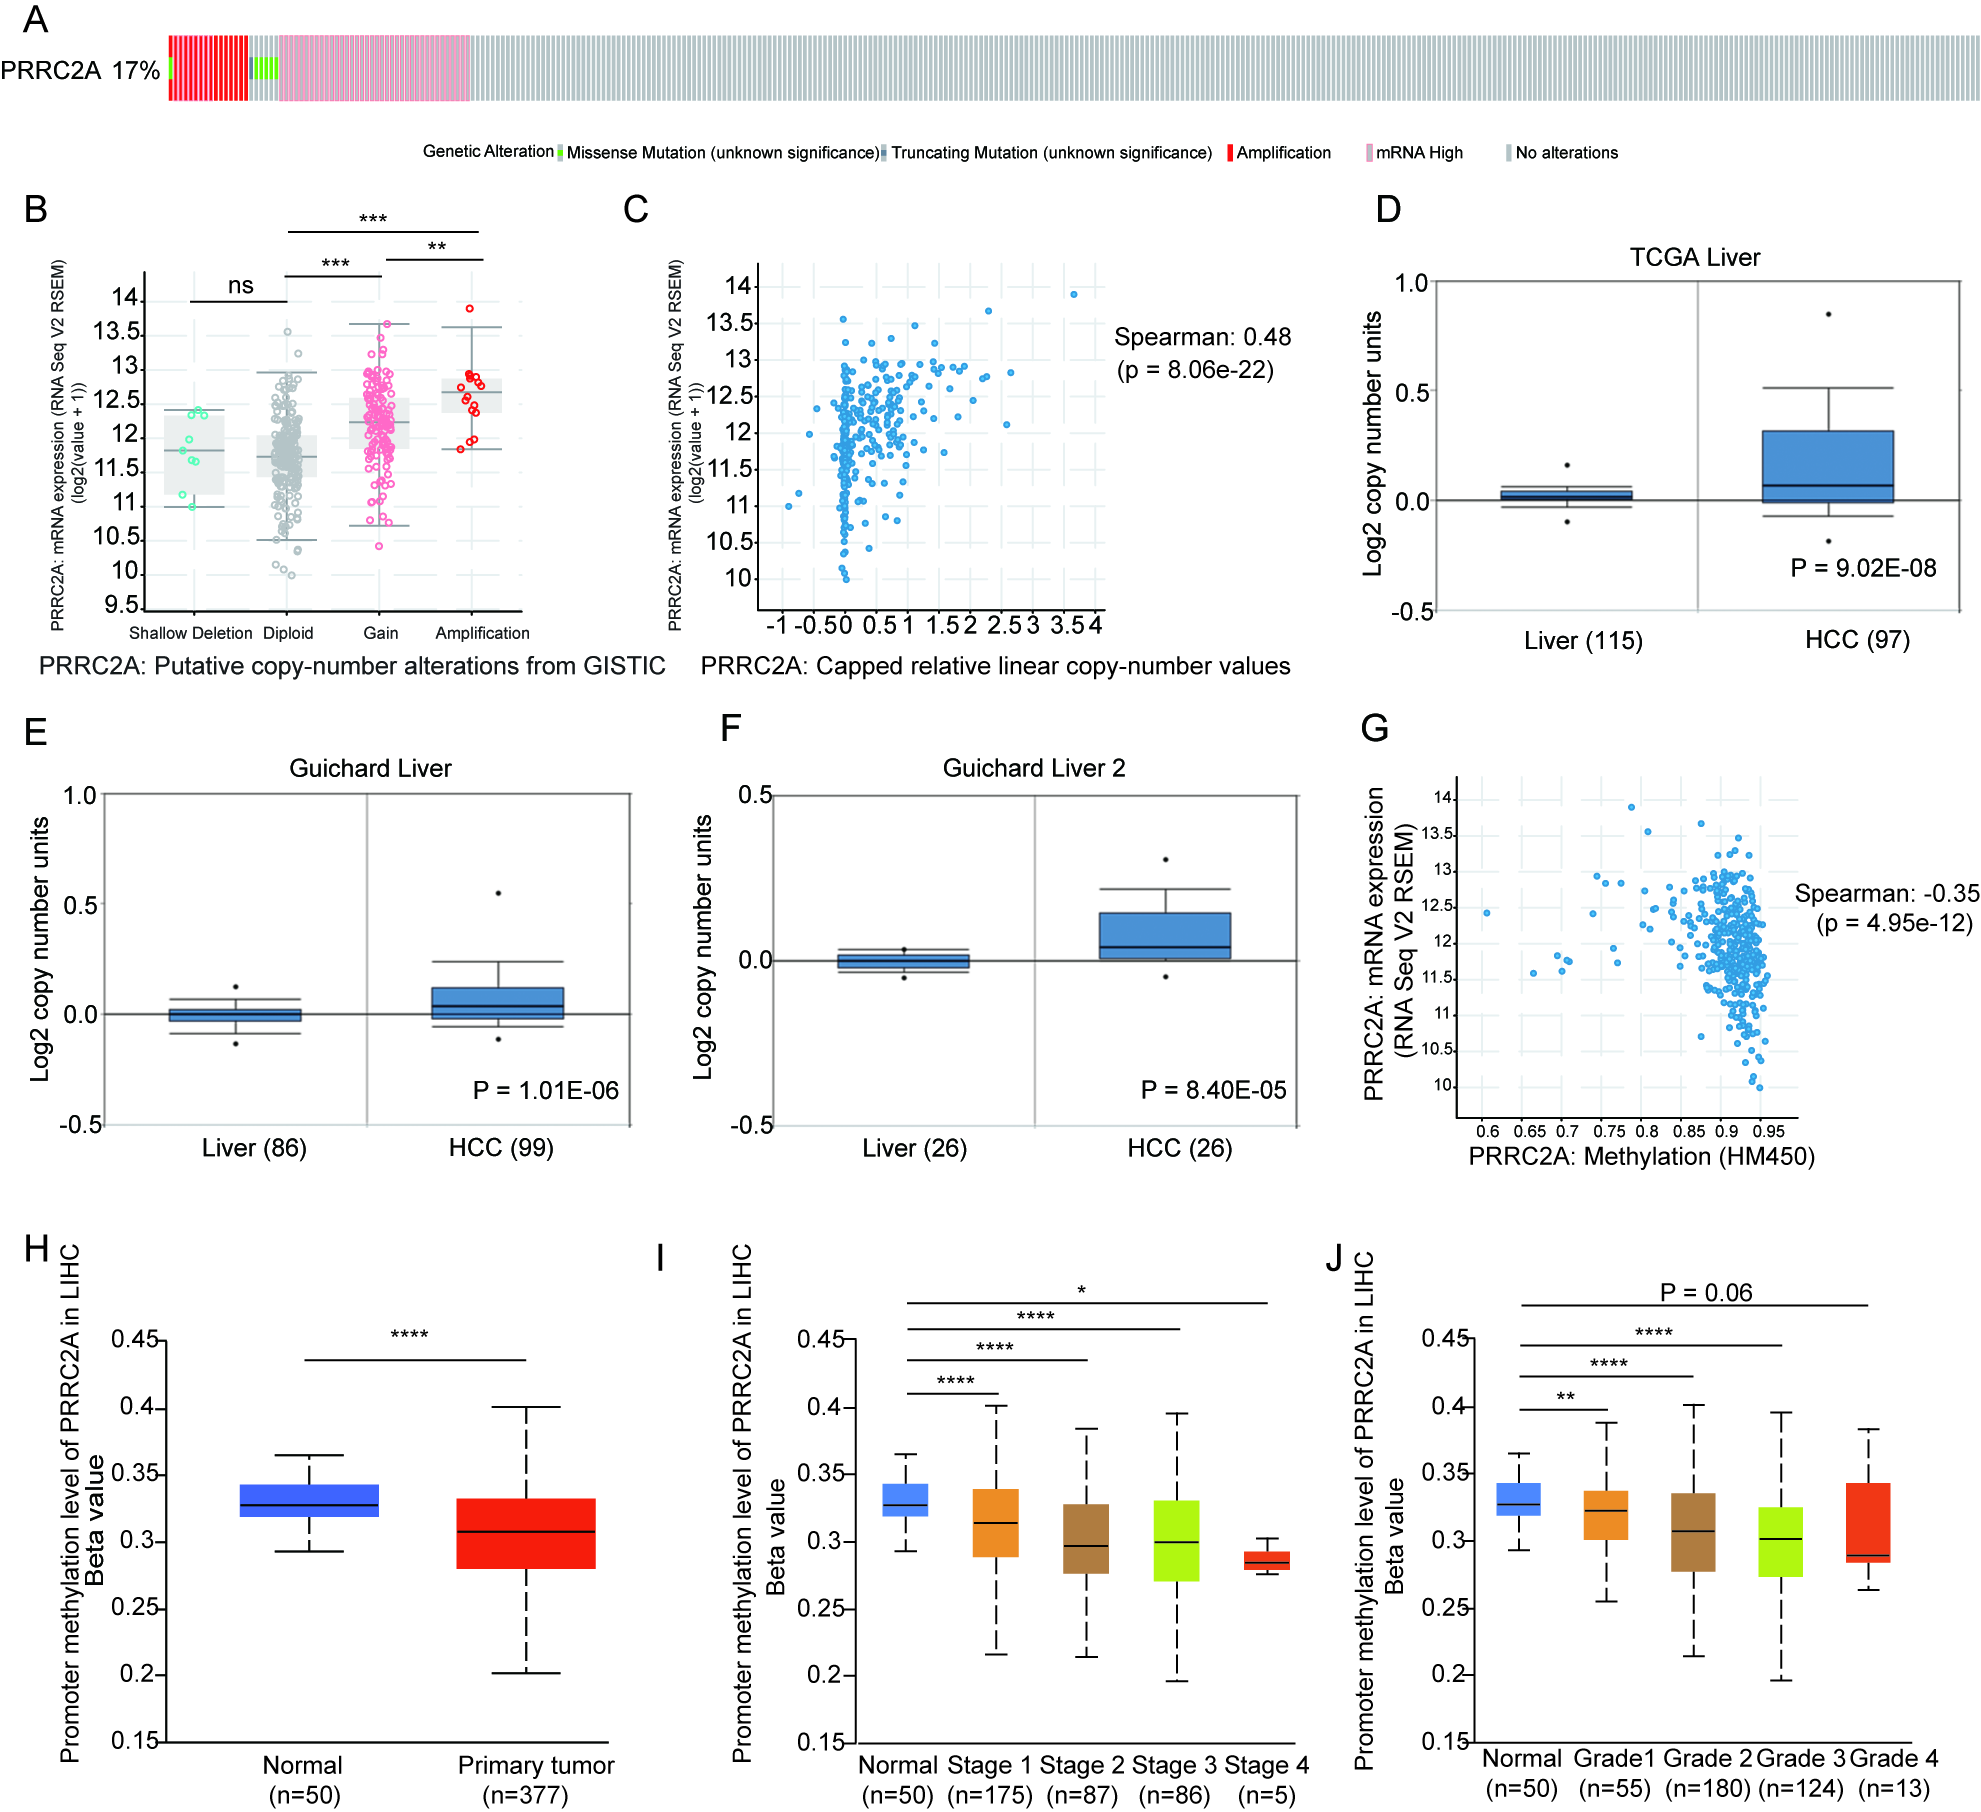


**Figure S4.** The expression of PRRC2A at protein level. (**A**) The representative IF images of PRRC2A in L02 and several HCC cell lines. (**B**) The representative IF images of PRRC2A in MHCC97H and HCCLM3 cells transfected with specific lentiviral vector.


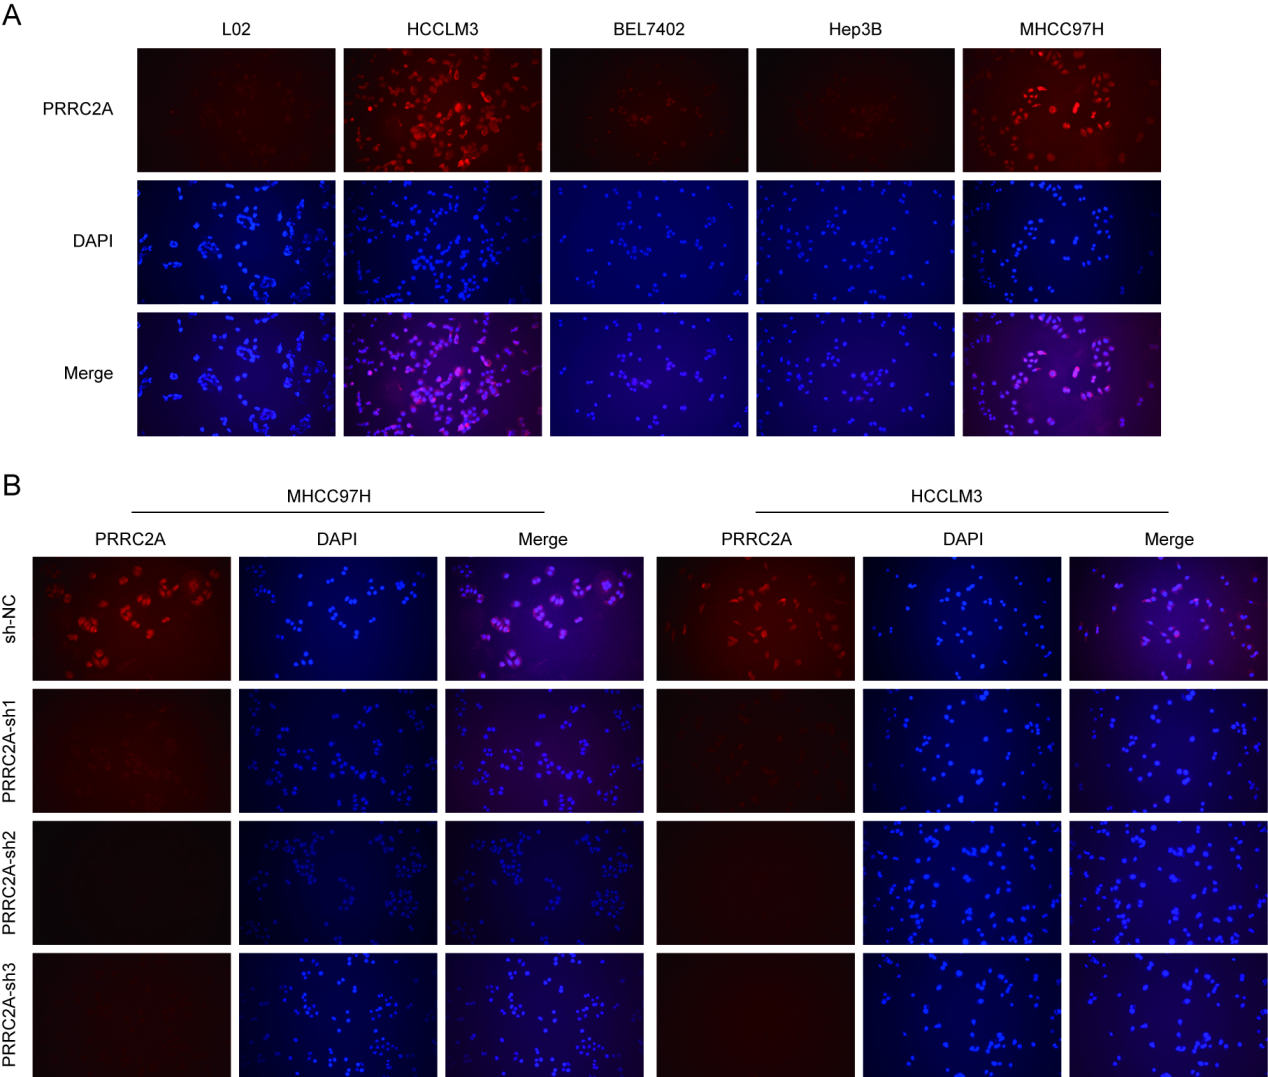


**Table S1.** The information of GEO datasets used in our study

| Cohort ID | Platform | Number of samples | | Public year | Country |
| --- | --- | --- | --- | --- | --- |
| Non-tumor | Tumor |
| GSE6764 | [GPL570](https://www.ncbi.nlm.nih.gov/geo/query/acc.cgi?acc=GPL570) | 40 | 35 | 2007 | USA |
| GSE45436 | [GPL570](https://www.ncbi.nlm.nih.gov/geo/query/acc.cgi?acc=GPL570) | 41 | 93 | 2014 | Taiwan China |
| GSE62232 | [GPL570](https://www.ncbi.nlm.nih.gov/geo/query/acc.cgi?acc=GPL570) | 10 | 81 | 2014 | France |
| GSE69715 | [GPL570](https://www.ncbi.nlm.nih.gov/geo/query/acc.cgi?acc=GPL570) | 66 | 37 | 2015 | Italy |
| GSE102083 | [GPL570](https://www.ncbi.nlm.nih.gov/geo/query/acc.cgi?acc=GPL570) | 105 | 152 | 2018 | Japan |

**Table S2.** The Top 50 of KEGG pathways based on PRRC2A expression in TCGA-LIHC dataset.

| ID | Description | Set size | Enrichment Score | NES | P value | Adjust P value |
| --- | --- | --- | --- | --- | --- | --- |
| hsa03030 | DNA replication | 36 | 0.711862608 | 1.898188 | 0.001017 | 0.009988 |
| hsa04110 | Cell cycle | 126 | 0.605373544 | 1.785324 | 0.000999 | 0.009988 |
| hsa03430 | Mismatch repair | 23 | 0.690146205 | 1.729271 | 0.002077 | 0.016822 |
| hsa03013 | Nucleocytoplasmic transport | 106 | 0.585542894 | 1.714486 | 0.000999 | 0.009988 |
| hsa05206 | MicroRNAs in cancer | 161 | 0.545639828 | 1.627632 | 0.000999 | 0.009988 |
| hsa04520 | Adherens junction | 66 | 0.567122779 | 1.609085 | 0.001002 | 0.009988 |
| hsa05211 | Renal cell carcinoma | 65 | 0.546792978 | 1.551267 | 0.001001 | 0.009988 |
| hsa04710 | Circadian rhythm | 30 | 0.591672159 | 1.543462 | 0.003071 | 0.023137 |
| hsa03440 | Homologous recombination | 37 | 0.576393866 | 1.542246 | 0.004057 | 0.029209 |
| hsa04218 | Cellular senescence | 155 | 0.509368648 | 1.517027 | 0.000999 | 0.009988 |
| hsa05220 | Chronic myeloid leukemia | 76 | 0.527953847 | 1.511937 | 0.001 | 0.009988 |
| hsa05219 | Bladder cancer | 41 | 0.55823268 | 1.511381 | 0.00404 | 0.029209 |
| hsa03460 | Fanconi anemia pathway | 49 | 0.545581426 | 1.503975 | 0.003018 | 0.023137 |
| hsa04919 | Thyroid hormone signaling pathway | 121 | 0.510260229 | 1.502365 | 0.000999 | 0.009988 |
| hsa03015 | mRNA surveillance pathway | 97 | 0.512854971 | 1.492633 | 0.000999 | 0.009988 |
| hsa04722 | Neurotrophin signaling pathway | 118 | 0.498535886 | 1.465305 | 0.000999 | 0.009988 |
| hsa04120 | Ubiquitin mediated proteolysis | 135 | 0.494122272 | 1.461331 | 0.000999 | 0.009988 |
| hsa03040 | Spliceosome | 130 | 0.491822391 | 1.451923 | 0.000999 | 0.009988 |
| hsa04330 | Notch signaling pathway | 58 | 0.517194301 | 1.450399 | 0.002008 | 0.016682 |
| hsa05100 | Bacterial invasion of epithelial cells | 69 | 0.502940556 | 1.432886 | 0.002004 | 0.016682 |
| hsa05161 | Hepatitis B | 159 | 0.480336669 | 1.432129 | 0.000999 | 0.009988 |
| hsa04668 | TNF signaling pathway | 111 | 0.487260228 | 1.429709 | 0.000999 | 0.009988 |
| hsa05212 | Pancreatic cancer | 76 | 0.498749926 | 1.428304 | 0.002 | 0.016682 |
| hsa04390 | Hippo signaling pathway | 154 | 0.479518904 | 1.427824 | 0.000999 | 0.009988 |
| hsa04144 | Endocytosis | 242 | 0.469963034 | 1.423539 | 0.000999 | 0.009988 |
| hsa04510 | Focal adhesion | 198 | 0.464003353 | 1.397254 | 0.000999 | 0.009988 |
| hsa04810 | Regulation of actin cytoskeleton | 216 | 0.462409261 | 1.396322 | 0.000999 | 0.009988 |
| hsa04540 | Gap junction | 86 | 0.48298597 | 1.394079 | 0.001 | 0.009988 |
| hsa05210 | Colorectal cancer | 86 | 0.482673218 | 1.393177 | 0.001 | 0.009988 |
| hsa05135 | Yersinia infection | 134 | 0.469931926 | 1.39067 | 0.000999 | 0.009988 |
| hsa04550 | Signaling pathways regulating pluripotency of stem cells | 143 | 0.468310831 | 1.389002 | 0.000999 | 0.009988 |
| hsa05203 | Viral carcinogenesis | 165 | 0.464258168 | 1.387236 | 0.000999 | 0.009988 |
| hsa04012 | ErbB signaling pathway | 83 | 0.479887732 | 1.384091 | 0.002 | 0.016682 |
| hsa04114 | Oocyte meiosis | 125 | 0.465162708 | 1.371166 | 0.001998 | 0.016682 |
| hsa03018 | RNA degradation | 75 | 0.478505761 | 1.369007 | 0.006006 | 0.038156 |
| hsa05222 | Small cell lung cancer | 92 | 0.469175543 | 1.362846 | 0.005 | 0.034468 |
| hsa05215 | Prostate cancer | 97 | 0.4658734 | 1.355896 | 0.005994 | 0.038156 |
| hsa04933 | AGE-RAGE signaling pathway in diabetic complications | 99 | 0.463626567 | 1.35209 | 0.005994 | 0.038156 |
| hsa04310 | Wnt signaling pathway | 163 | 0.451462155 | 1.348172 | 0.001998 | 0.016682 |
| hsa05168 | Herpes simplex virus 1 infection | 486 | 0.43685471 | 1.346436 | 0.000999 | 0.009988 |
| hsa04360 | Axon guidance | 180 | 0.447901758 | 1.345589 | 0.000999 | 0.009988 |
| hsa04912 | GnRH signaling pathway | 93 | 0.462707348 | 1.343653 | 0.007 | 0.042 |
| hsa04914 | Progesterone-mediated oocyte maturation | 97 | 0.461408128 | 1.342901 | 0.006993 | 0.042 |
| hsa05130 | Pathogenic Escherichia coli infection | 194 | 0.443198056 | 1.334703 | 0.000999 | 0.009988 |
| hsa05166 | Human T-cell leukemia virus 1 infection | 220 | 0.441122167 | 1.332991 | 0.000999 | 0.009988 |
| hsa05205 | Proteoglycans in cancer | 202 | 0.442072411 | 1.332022 | 0.000999 | 0.009988 |
| hsa01522 | Endocrine resistance | 95 | 0.45762537 | 1.331067 | 0.006993 | 0.042 |
| hsa05165 | Human papillomavirus infection | 328 | 0.433199576 | 1.324401 | 0.000999 | 0.009988 |
| hsa05163 | Human cytomegalovirus infection | 219 | 0.434113425 | 1.311558 | 0.000999 | 0.009988 |
| hsa05132 | Salmonella infection | 249 | 0.431879587 | 1.310774 | 0.000999 | 0.009988 |

**Table S3.** The Top 50 of GO pathways based on PRRC2A expression in TCGA-LIHC dataset.

| ID | Description | Set size | Enrichment Score | NES | P value | Adjust P value |
| --- | --- | --- | --- | --- | --- | --- |
| GO:0051983 | regulation of chromosome segregation | 96 | 0.668413 | 1.943488 | 0.001 | 0.014076 |
| GO:0006409 | tRNA export from nucleus | 32 | 0.724229 | 1.922103 | 0.00102 | 0.014076 |
| GO:0071431 | tRNA-containing ribonucleoprotein complex export from nucleus | 32 | 0.724229 | 1.922103 | 0.00102 | 0.014076 |
| GO:0051031 | tRNA transport | 34 | 0.718712 | 1.918797 | 0.001019 | 0.014076 |
| GO:0048096 | chromatin-mediated maintenance of transcription | 11 | 0.852681 | 1.916539 | 0.001089 | 0.014076 |
| GO:0097064 | ncRNA export from nucleus | 36 | 0.709816 | 1.907883 | 0.001014 | 0.014076 |
| GO:0006271 | DNA strand elongation involved in DNA replication | 20 | 0.762562 | 1.90762 | 0.001044 | 0.014076 |
| GO:0051984 | positive regulation of chromosome segregation | 25 | 0.741123 | 1.905303 | 0.001031 | 0.014076 |
| GO:0033045 | regulation of sister chromatid segregation | 75 | 0.668196 | 1.905024 | 0.000999 | 0.014076 |
| GO:0044786 | cell cycle DNA replication | 69 | 0.671418 | 1.899077 | 0.001 | 0.014076 |
| GO:0007062 | sister chromatid cohesion | 47 | 0.690863 | 1.896528 | 0.001005 | 0.014076 |
| GO:0033260 | nuclear DNA replication | 59 | 0.67287 | 1.88601 | 0.001002 | 0.014076 |
| GO:0007063 | regulation of sister chromatid cohesion | 18 | 0.766763 | 1.884742 | 0.001055 | 0.014076 |
| GO:0000819 | sister chromatid segregation | 172 | 0.629319 | 1.878918 | 0.000999 | 0.014076 |
| GO:0000727 | double-strand break repair via break-induced replication | 11 | 0.834081 | 1.874733 | 0.001089 | 0.014076 |
| GO:0033047 | regulation of mitotic sister chromatid segregation | 64 | 0.66468 | 1.869746 | 0.001001 | 0.014076 |
| GO:0051383 | kinetochore organization | 19 | 0.75177 | 1.867612 | 0.001047 | 0.014076 |
| GO:0006270 | DNA replication initiation | 37 | 0.691637 | 1.860354 | 0.001014 | 0.014076 |
| GO:0000070 | mitotic sister chromatid segregation | 144 | 0.626685 | 1.859505 | 0.000999 | 0.014076 |
| GO:0051231 | spindle elongation | 10 | 0.84434 | 1.859171 | 0.0011 | 0.014125 |
| GO:0034728 | nucleosome organization | 108 | 0.634352 | 1.857211 | 0.000999 | 0.014076 |
| GO:0043486 | histone exchange | 42 | 0.682461 | 1.855354 | 0.00101 | 0.014076 |
| GO:1905819 | negative regulation of chromosome separation | 39 | 0.683019 | 1.850092 | 0.001011 | 0.014076 |
| GO:0033046 | negative regulation of sister chromatid segregation | 42 | 0.680341 | 1.84959 | 0.00101 | 0.014076 |
| GO:2000816 | negative regulation of mitotic sister chromatid separation | 38 | 0.684576 | 1.849162 | 0.001012 | 0.014076 |
| GO:0034724 | DNA replication-independent nucleosome organization | 36 | 0.687892 | 1.848954 | 0.001014 | 0.014076 |
| GO:0034508 | centromere complex assembly | 37 | 0.687388 | 1.848924 | 0.001014 | 0.014076 |
| GO:0051985 | negative regulation of chromosome segregation | 43 | 0.678877 | 1.848854 | 0.001009 | 0.014076 |
| GO:0000083 | regulation of transcription involved in G1/S transition of mitotic cell cycle | 28 | 0.708063 | 1.84871 | 0.001027 | 0.014076 |
| GO:0007064 | mitotic sister chromatid cohesion | 18 | 0.750098 | 1.843777 | 0.001055 | 0.014076 |
| GO:0031498 | chromatin disassembly | 19 | 0.741267 | 1.841522 | 0.001047 | 0.014076 |
| GO:0006333 | chromatin assembly or disassembly | 115 | 0.627793 | 1.840246 | 0.000999 | 0.014076 |
| GO:0006336 | DNA replication-independent nucleosome assembly | 35 | 0.684797 | 1.833846 | 0.001017 | 0.014076 |
| GO:0006337 | nucleosome disassembly | 17 | 0.749978 | 1.829447 | 0.001056 | 0.014076 |
| GO:0033048 | negative regulation of mitotic sister chromatid segregation | 41 | 0.673444 | 1.829346 | 0.00101 | 0.014076 |
| GO:0034080 | CENP-A containing nucleosome assembly | 27 | 0.70319 | 1.82889 | 0.001025 | 0.014076 |
| GO:0061641 | CENP-A containing chromatin organization | 27 | 0.70319 | 1.82889 | 0.001025 | 0.014076 |
| GO:0031055 | chromatin remodeling at centromere | 29 | 0.696653 | 1.824943 | 0.001026 | 0.014076 |
| GO:0007052 | mitotic spindle organization | 102 | 0.624582 | 1.823269 | 0.000999 | 0.014076 |
| GO:0045839 | negative regulation of mitotic nuclear division | 51 | 0.656013 | 1.819727 | 0.001004 | 0.014076 |
| GO:0045841 | negative regulation of mitotic metaphase/anaphase transition | 36 | 0.676933 | 1.819499 | 0.001014 | 0.014076 |
| GO:1902100 | negative regulation of metaphase/anaphase transition of cell cycle | 37 | 0.675331 | 1.816494 | 0.001014 | 0.014076 |
| GO:0006323 | DNA packaging | 133 | 0.613717 | 1.812809 | 0.000999 | 0.014076 |
| GO:0000212 | meiotic spindle organization | 12 | 0.793829 | 1.812202 | 0.001092 | 0.014076 |
| GO:0010965 | regulation of mitotic sister chromatid separation | 56 | 0.647612 | 1.810798 | 0.001002 | 0.014076 |
| GO:0043044 | ATP-dependent chromatin remodeling | 70 | 0.639153 | 1.809819 | 0.001 | 0.014076 |
| GO:0008608 | attachment of spindle microtubules to kinetochore | 29 | 0.69043 | 1.808642 | 0.001026 | 0.014076 |
| GO:0098813 | nuclear chromosome segregation | 236 | 0.596259 | 1.801968 | 0.000999 | 0.014076 |
| GO:0006268 | DNA unwinding involved in DNA replication | 13 | 0.773438 | 1.797054 | 0.001085 | 0.014076 |
| GO:0072697 | protein localization to cell cortex | 12 | 0.786339 | 1.795103 | 0.001092 | 0.014076 |
